# Supplementary material
Source: Copernicus journal article supplement (doi:10.5194/bg-23-2451-2026)
Supplement: Supplementary file 1 [file bg-23-2451-2026-supplement.pdf]

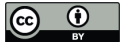

*Supplement of*

**Forest diversity and environmental factors shape contrasting soil-litter fluxes of biogenic volatile organic compounds and methane in three central Amazonian ecosystems**

**Déborá Pinheiro-Oliveira et al.**

*Correspondence to:* Déborá Pinheiro-Oliveira ([dpinheiro@bgc-jena.mpg.de](mailto:dpinheiro@bgc-jena.mpg.de)) and Eliane Gomes Alves ([egomes@bgc-jena.mpg.de](mailto:egomes@bgc-jena.mpg.de))

The copyright of individual parts of the supplement might differ from the article licence.

# 1 Supplementary Material

## 2 S1. Soil Texture

3 **Table S1.** Soil particle size distribution in three forest types in central Amazonia. The data  
4 represents the percentage composition of total sand, silt, and clay. Each sample is a composite  
5 sample from two nearby points in the field. AR = Ancient River Terrace Forest, WS = White Sand  
6 Forest, Up = Upland Forest.

7

|             |         | Soil Texture |          |          |
|-------------|---------|--------------|----------|----------|
| Forest type | samples | Sand (%)     | Silt (%) | Clay (%) |
| AR          | TR1.1   | 45.449       | 37.801   | 16.75    |
| AR          | TR1.2   | 45.449       | 37.801   | 16.75    |
| AR          | TR1.3   | 47.639       | 30.061   | 22.30    |
| AR          | TR1.4   | 47.639       | 30.061   | 22.30    |
| AR          | TR1.5   | 12.38        | 56.22    | 31.40    |
| AR          | TR1.6   | 12.38        | 56.22    | 31.40    |
| AR          | TR2.1   | 41.543       | 34.457   | 24.00    |
| AR          | TR2.2   | 41.543       | 34.457   | 24.00    |
| AR          | TR2.3   | 42.078       | 35.422   | 22.50    |
| AR          | TR2.4   | 42.078       | 35.422   | 22.50    |
| AR          | TR2.5   | 47.17        | 28.68    | 24.15    |
| AR          | TR2.6   | 47.17        | 28.68    | 24.15    |
| WS          | CP1.1   | 46.15        | 52.35    | 1.50     |
| WS          | CP1.2   | 46.15        | 52.35    | 1.50     |
| WS          | CP1.3   | 50.07        | 47.68    | 2.25     |
| WS          | CP1.4   | 50.07        | 47.68    | 2.25     |
| WS          | CP1.5   | 74.398       | 24.252   | 1.35     |
| WS          | CP1.6   | 74.398       | 24.252   | 1.35     |
| WS          | CP2.1   | 76.599       | 22.301   | 1.10     |
| WS          | CP2.2   | 76.599       | 22.301   | 1.10     |
| WS          | CP2.3   | 24.134       | 74.616   | 1.25     |
| WS          | CP2.4   | 24.134       | 74.616   | 1.25     |
| WS          | CP2.5   | 73.883       | 24.517   | 1.60     |
| WS          | CP2.6   | 73.883       | 24.517   | 1.60     |
| Up          | TF1.1   | 23.011       | 26.139   | 50.85    |
| Up          | TF1.2   | 23.011       | 26.139   | 50.85    |
| Up          | TF1.3   | 12.595       | 30.255   | 57.15    |
| Up          | TF1.4   | 12.595       | 30.255   | 57.15    |
| Up          | TF1.5   | 12.698       | 38.602   | 48.70    |
| Up          | TF1.6   | 12.698       | 38.602   | 48.70    |
| Up          | TF2.1   | 11.892       | 40.858   | 47.25    |

|    |       |        |        |       |
|----|-------|--------|--------|-------|
| Up | TF2.2 | 11.892 | 40.858 | 47.25 |
| Up | TF2.3 | 10.194 | 32.506 | 57.30 |
| Up | TF2.4 | 10.194 | 32.506 | 57.30 |
| Up | TF2.5 | 9.587  | 35.413 | 55.00 |
| Up | TF2.6 | 9.587  | 35.413 | 55.00 |

8

9 **S2. Calibration gas composition**

10 **Table S2.** Multi-component calibration mixture in synthetic air, as used for the calibration of the PTR-  
 11 QMS. Uncertainty is a conservative estimate of the combination of gravimetric preparation and analysis  
 12 uncertainties.

| Compound        | CAS#       | Concentration (ppb) | Uncertainty |
|-----------------|------------|---------------------|-------------|
| Formaldehyde    | 50-0-0     | 992                 | 5%          |
| Acetaldehyde    | 75-07-0    | 426                 | 5%          |
| Methanol        | 67-56-1    | 521                 | 5%          |
| Ethanol         | 64-17-5    | 528                 | 5%          |
| Acetonitrile    | 75-05-8    | 523                 | 5%          |
| Acetone         | 67-64-1    | 497                 | 5%          |
| Isoprene        | 78-79-5    | 468                 | 5%          |
| DMS             | 75-18-3    | 487                 | 5%          |
| a-Pinene        | 80-56-8    | 488                 | 5%          |
| Camphene        | 79-92-5    | 504                 | 5%          |
| B-Pinene        | 18172-67-3 | 512                 | 5%          |
| a-Phellandrene  | 4221-98-1  | 432                 | 5%          |
| 3-Carene        | 13466-78-9 | 458                 | 5%          |
| Limonene        | 5889-54-8  | 489                 | 5%          |
| o-Cymene        | 527-84-4   | 481                 | 5%          |
| y-Terpinene     | 99-85-4    | 476                 | 5%          |
| B-Caryophyllene | 87-44-5    | 98.3                | 5%          |
| a-Humulene      | 6753-98-6  | 95.2                | 5%          |

13

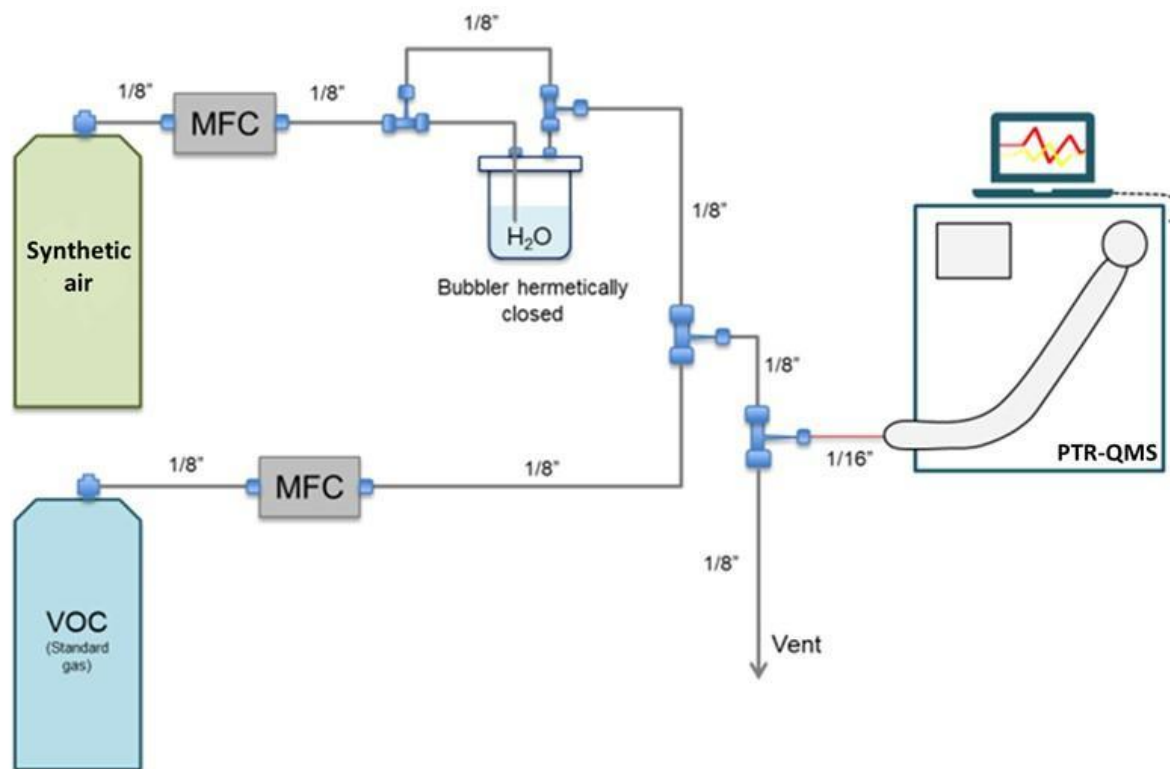

14 MFC= mass flow controller

15 **Figure S1.** PTR-QMS calibration setup scheme, the VOC standard gas is as described in Table  
 16 S2, figure adapted from Caetano (2022).

### 17 S3. BVOC & GHG flux calculation

18 Fluxes were calculated using the closed chamber formulation, as given in equation 1 (manuscript,  
 19 Section 2.5). It should be considered that the chamber was operated under a continuous flow (0.5 L  
 20 min<sup>-1</sup>), which introduces a constant small dilution of the accumulating BVOCs and GHG. Therefore, the  
 21 system is formally a non-steady-state flow-through chamber rather than a strictly static chamber. Using  
 22 the closed chamber formula instead of the non-steady-state flow-through chamber formula leads to an  
 23 underestimation of 25%, as shown below.

24

25 For a flow-through chamber with volume  $V$ , surface area  $A$ , flow rate  $Q$ , and enclosure time  $t$ , the  
 26 transient mass balance gives:

27 
$$C(t) - C_{in} = \frac{FA}{Q} (1 - e^{-Qt/V}) \tag{S1}$$

28 Solving for flux yields the non-steady-state formulation:

29

$$30 \quad F_{open} = \frac{Q}{A} \frac{\Delta C(t)}{1 - e^{-Qt/V}} \frac{P}{RT} \quad (S2)$$

31

32 where  $\Delta C(t) = C(t) - C_{in}$ ,  $P$  is pressure,  $T$  is temperature, and  $R$  is the gas constant.

33

34 In contrast, the closed chamber formulation assumes linear accumulation:

35

$$36 \quad F_{closed} = \frac{V}{A} \frac{\Delta C(t)}{t} \frac{P}{RT} \quad (S3)$$

37

38 The relative bias introduced by applying the closed formulation to a flow-through system depends only  
39 on the dimensionless term  $Qt/V$ :

40

$$41 \quad \frac{F_{closed}}{F_{open}} = \frac{1 - e^{-Qt/V}}{Qt/V} \quad (S4)$$

42

43 For the present study:

$$44 \quad t = 25 \text{ min}$$

$$45 \quad Q = 0.5 \text{ L min}^{-1}$$

$$46 \quad V = 21 \text{ L}$$

47 This gives:

$$48 \quad \frac{Qt}{V} = 0.595$$

49

50 and therefore:

$$51 \quad \frac{F_{closed}}{F_{open}} = 0.754$$

52

53 indicating that the closed chamber approach underestimates the flux by approximately:

$$54 \quad 1 - 0.754 = 0.246 \approx 25\%$$

55

56 Thus, for the chamber configuration used here ( $A = 0.0855 \text{ m}^2$ ,  $V = 21\text{L}$ ,  $Q = 0.5 \text{ L min}^{-1}$ , enclosure time  
57 25 min), the expected underestimation due to assuming closed chamber conditions is on the order of  
58 25%. Importantly, this correction depends only on the  $Qt/V$  ratio and is independent of the absolute  
59 magnitude of the flux. The reported fluxes should therefore be considered conservative estimates, and  
60 this potential bias does not affect the main conclusions of the study.

61

62

## 63 **S4. Gas Chromatography - Time of Flight Mass Spectrometer (GC-TOF-MS) analysis**

### 64 **S4.1 GC-TOF-MS: Material & Methods**

65 After determining gas mixing ratios on the PTR-QMS and the Los Gatos analyzer, samples were  
66 collected onto cartridges (stainless steel tubes filled with Tenax TA and Carbograph 5 TD  
67 adsorbents, Markes International, UK) at a rate of 200 sccm for 10 min, which resulted in 2L air  
68 samples for compound identification and quantification analyses with the GC-TOFMS. The  
69 cartridges were stored in an air-conditioned room for up to six months until they were analyzed.

70 Samples were examined with a thermal-desorption gas chromatograph coupled to a time-of-flight  
71 mass spectrometer (TD-GC-TOF-MS; Bench TOF Tandem Ionisation, Markes International, UK).  
72 A complete description of the instrument, analytical procedure, and performance is available in  
73 Zannoni et al. (2020a, 2020b). In the TD-GC-TOF-MS, the analytes are desorbed from the  
74 sampling tubes using two sequential stages, performed at 250°C for 10 minutes, then carried by a  
75 flow of He into the separating column in the gas chromatograph. The column is a dimethyl TBS  
76  $\beta$ -cyclodextrin column (0.25 $\mu\text{m}$ , 0.25mm ID, 30 mL, from MEGA, Italy), which separates the  
77 analytes according to volatility and enantiomeric configuration. The separation method was  
78 specifically designed for the separation of chiral monoterpenes ( $\text{C}_{10}\text{H}_{16}$ ) and sesquiterpenes  
79 ( $\text{C}_{15}\text{H}_{24}$ ) and consisted of an initial 5 min when the oven temperature was held at 40°C, after which  
80 it was increased at a rate of 1.5 °C/min from 40°C to 150°C. Finally, the temperature increased  
81 further at a rate of 30°C/min from 150°C to 200°C. Detection was performed by a Time-of-Flight  
82 Mass Spectrometer, which fragments the analytes through electron impact ionization at -70 eV for  
83 quantification and identification of the chemical species. Identification of the main chemical

84 compounds was obtained by comparing the MS spectra with the MS library for the same ionization  
85 energy (NIST library), by injection of a calibration gas standard mixture (19 biogenic volatile  
86 organic compounds provided by Apel Riemer, USA), and by use of liquid standards.  
87 Chromatogram peak areas were integrated through TOF-DS software provided with the instrument  
88 (Markes International, UK). The standard gas used is a certified concentrated mixture (~100 ppbv)  
89 of 19 BVOCs, including, among the other species, four pairs of chiral terpenoids ( $\alpha$ -pinene,  $\beta$ -  
90 pinene, limonene, linalool), isoprene, and one sesquiterpene ( $\beta$ -caryophyllene). The GC-TOF  
91 sensitivity was quantified by measuring the concentration of BVOCs in standard sorbent tubes  
92 filled with 2 L of gas standard diluted in a pure synthetic air flow with four dilution steps to achieve  
93 concentrations in the range of 0.05-1 ppb. Such calibrations were performed before or at the end  
94 of each sample batch. The obtained calibration factors were confirmed using standard cartridges  
95 containing a known BVOC concentration (~0.150 ppb) in a workflow, with a standard cartridge  
96 measured for every 10 samples analyzed. The standard cartridges were analyzed in this way to  
97 determine the analysis precision (including any mass spectrometer drift), which was quantified at  
98 22% (Zannoni *et al.* 2020a and Zannoni *et al.* 2020b).

99

#### 100 **S4.2 GC-TOF-MS: Results**

101 For all BVOC fluxes studied, emissions were highest in the White Sand Forest. Notably, some  
102 BVOCs were detected exclusively in the White Sand Forest and were completely absent from the  
103 other forest types (Figure S2).

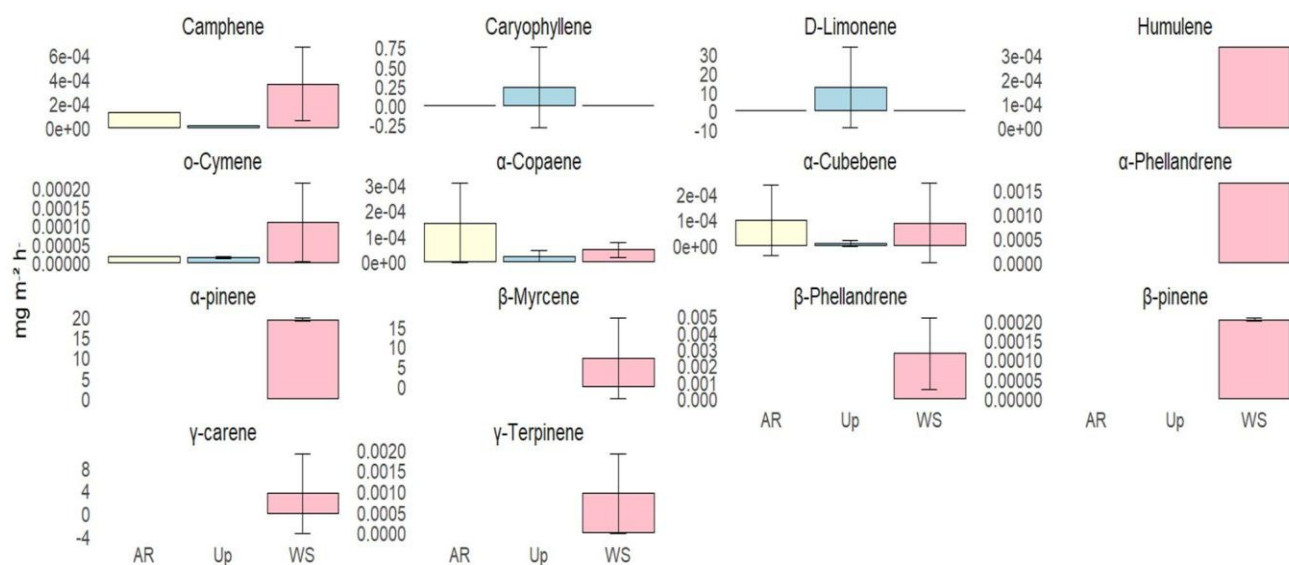

█ AR (Ancient River Terrace Forest) 
 █ WS (White Sand Forest) 
 █ Up (Upland Forest)

104

105 **Figure S2.** BVOC Fluxes from the soil and litter across the three forest types. Bar plot of the 12 samples  
 106 from each environment.

107

108 **S5. Linear Models (LM)**

109 **S5.1 White sand forest fluxes and their potential predictors**

110 Firstly, we investigated the relationships among the potential predictor variables in the white sand  
 111 forest ecosystem, independent of their relation to gas fluxes. These predictor variables include soil  
 112 and litter characteristics, microbial biomass, soil moisture, and temperature. The Pearson  
 113 correlations for these variables are presented in Figure S3a, which highlights the interactions and  
 114 dependencies between environmental drivers only.

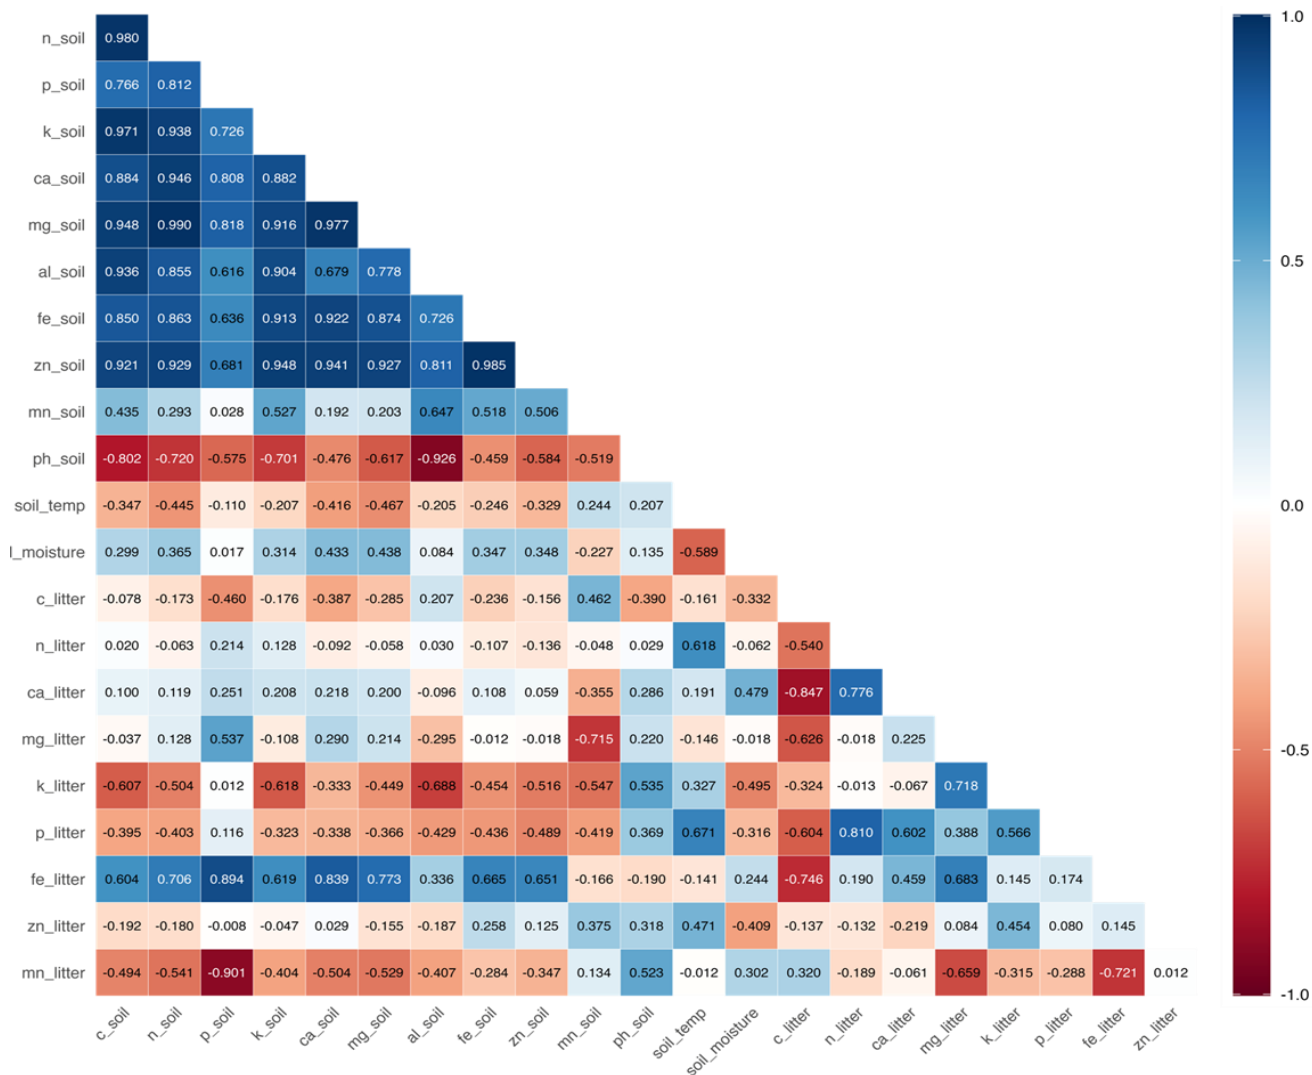

115

116 **Figure S3a.** Heatmap for the Pearson correlation coefficients for the potential predictors of fluxes  
 117 in the white sand forest. N = 12.

118 Secondly, we analyzed the correlations between the potential predictor variables and the response  
 119 variables, which are the BVOC and GHG fluxes measured in this study. The Pearson correlations  
 120 for these relationships are shown in Figure S3b, which specifically highlights how the fluxes of  
 121 BVOCs and GHGs are associated with environmental drivers. This distinction between Figure S3a  
 122 (predictor-predictor correlations) and Figure S3b (predictor-response correlations) underscores the  
 123 separate analyses of interactions among environmental variables and their direct associations with  
 124 gas fluxes.

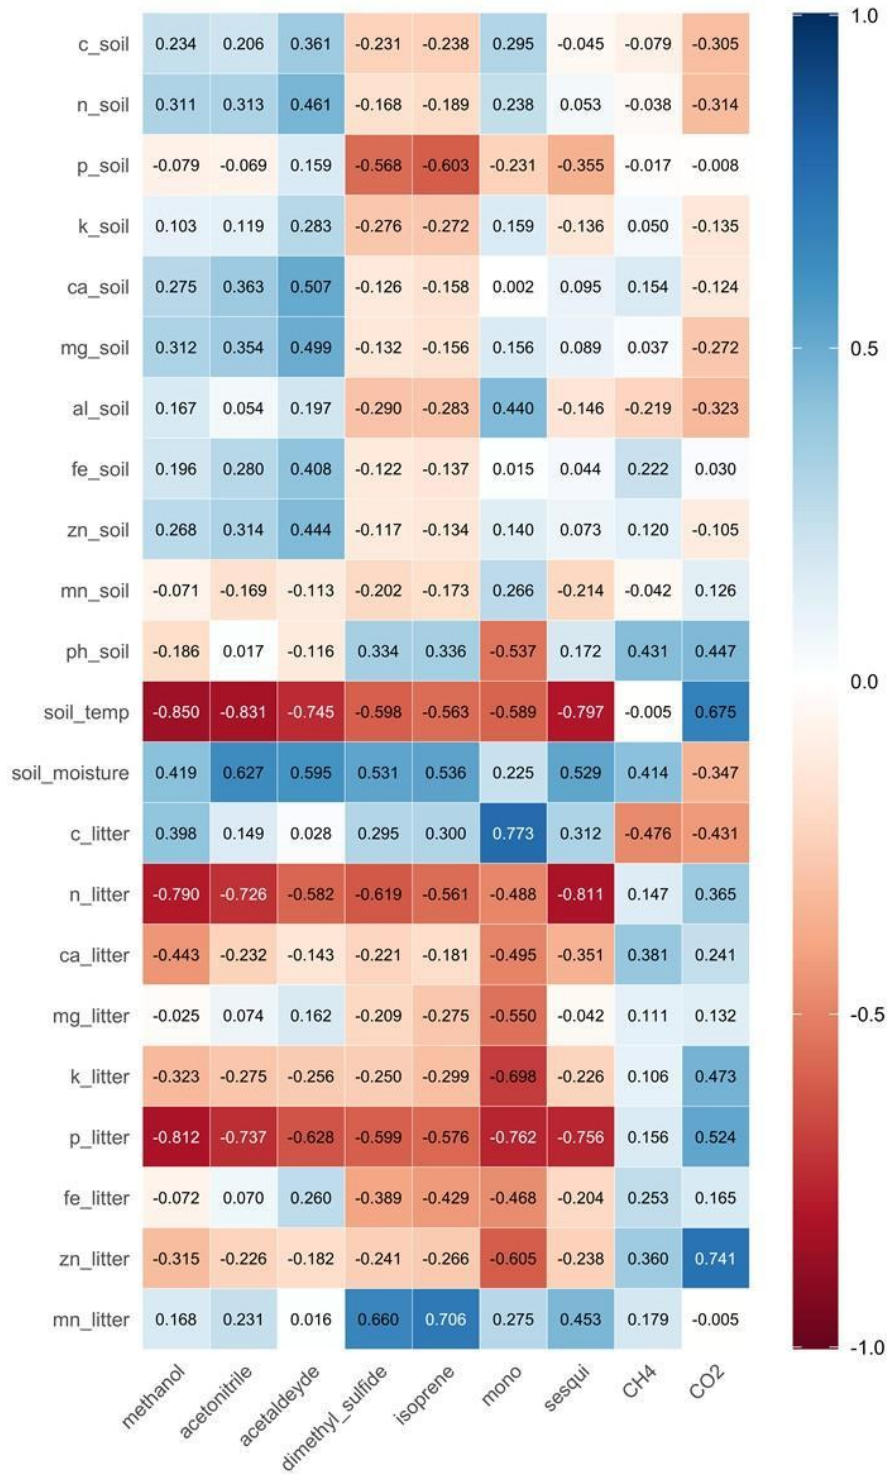

125

126 **Figure S3b.** Heatmap for the Pearson correlation coefficients for the correlation between gas  
 127 fluxes and their potential predictors in the white sand forest. N = 12.

128 **S5.2 Ancient River Terrace Forest fluxes and their potential predictors**

129 Initially, our investigation into the ancient river terrace forest ecosystem centered on delineating  
 130 the intricate relationships among its key predictor variables. These variables encompass a range of  
 131 soil and litter characteristics, microbial biomass metrics, and essential environmental parameters  
 132 such as soil moisture and temperature. The outcomes of these Pearson correlation analyses are  
 133 visually encapsulated in Figure S4a, which specifically illuminates the interdependence and  
 134 patterns observed exclusively among these potential environmental drivers.

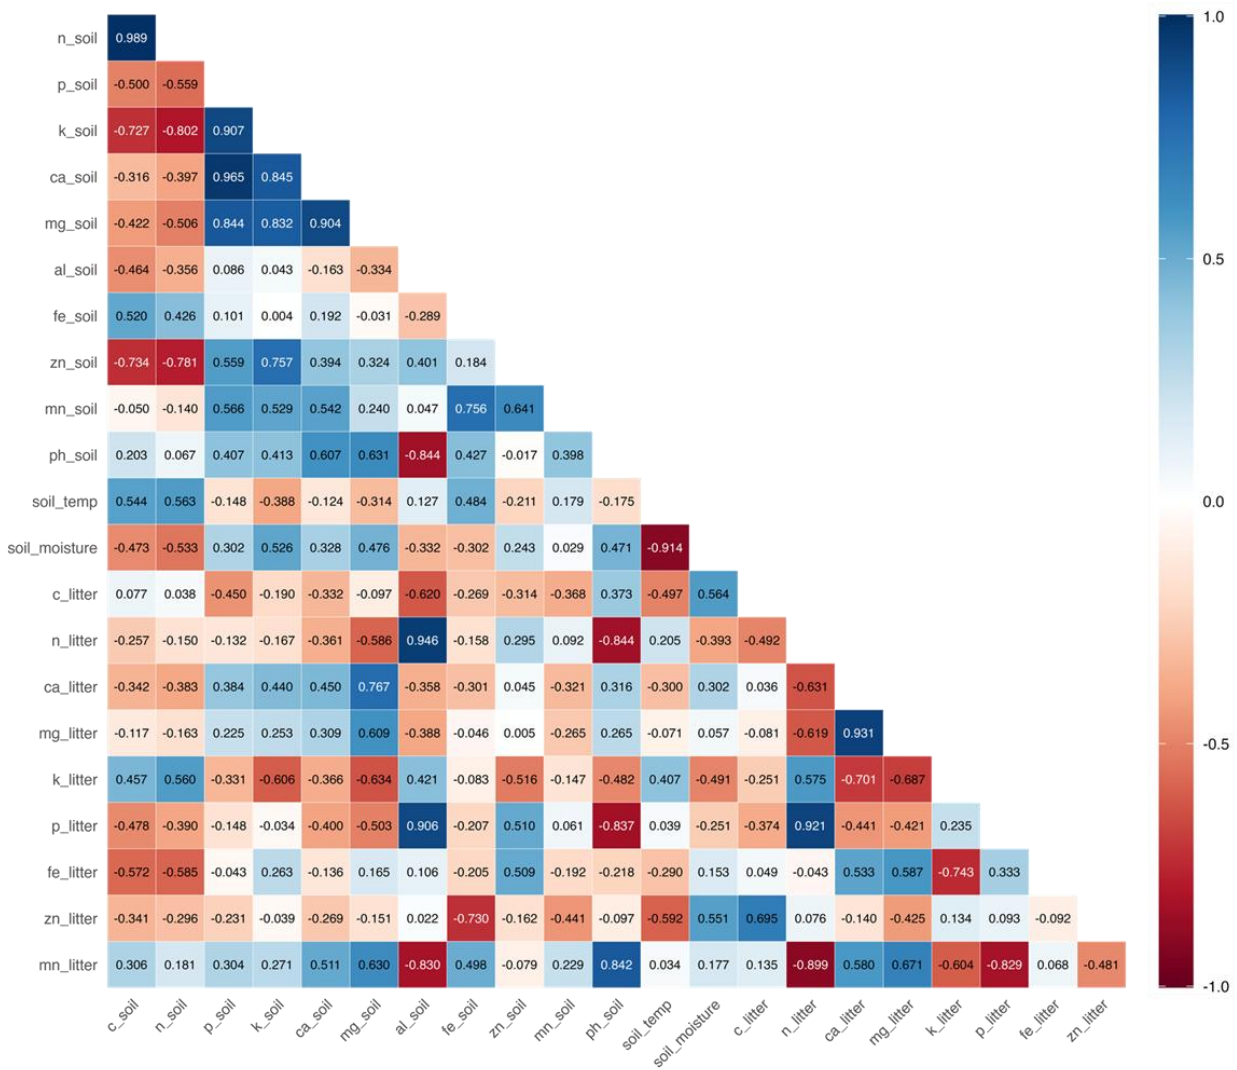

135  
 136 **Figure S4a.** Heatmap for the Pearson correlation coefficients for the potential predictors of gas  
 137 fluxes in the ancient river terrace forest. N = 12.

138 Following this, direct correlations were examined between these same predictor variables and the  
139 measured response variables: BVOC and GHG fluxes. Figure S4b illustrates these Pearson  
140 correlations, highlighting specific associations between environmental factors and observed  
141 magnitudes of BVOC and GHG exchange. By presenting Figure S4a for predictor-predictor  
142 correlations and Figure S4b for predictor-response correlations, the goal was to provide a clear,  
143 two-level understanding of the underlying factors influencing gas fluxes in this type of forest.

144

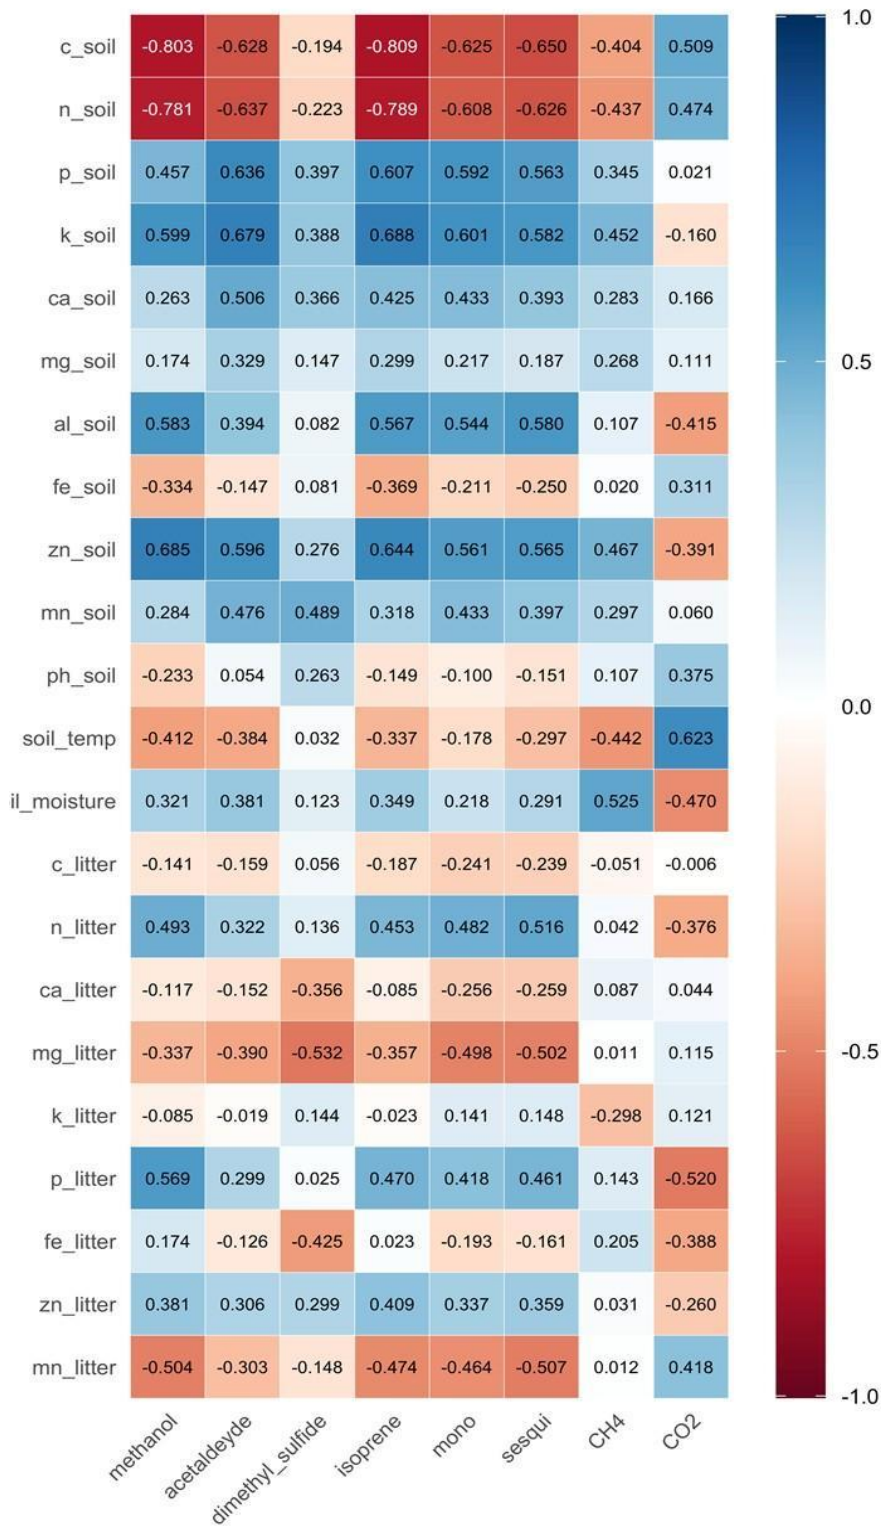

145

146

147

**Figure S4b.** Heatmap for the Pearson correlation coefficients for the correlation between gas fluxes and their potential predictors in the ancient river terrace forest. N = 12.

148 **S5.3 Upland forest fluxes and their potential predictors**

149 For the upland forest, we started by exploring the interrelationships existing between its various  
 150 potential predictor variables. These predictors comprise elements such as soil and litter properties,  
 151 indicators of microbial activity, and critical environmental conditions like soil moisture and  
 152 temperature. The Pearson correlation coefficients that define these connections are systematically  
 153 displayed in Figure S5a, providing a comprehensive overview of the intrinsic linkages among these  
 154 environmental factors.

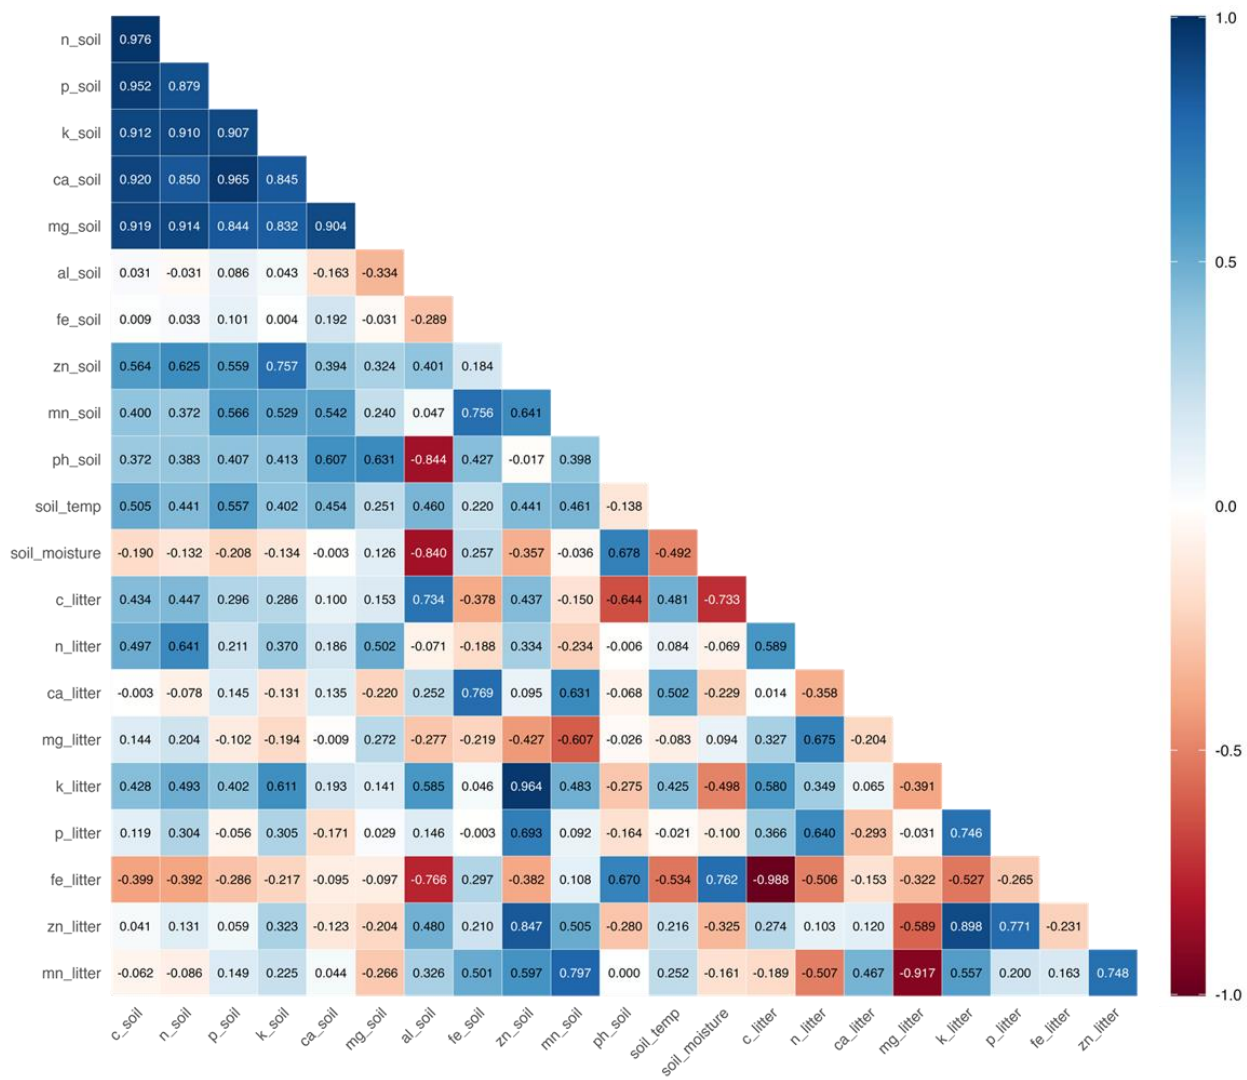

155  
 156 **Figure S5a.** Heatmap for the Pearson correlation coefficients for the potential predictors of gas  
 157 fluxes and their potential predictors in the upland forest. N = 12.

158 Subsequently, the focus shifted to quantifying the correlations between these identified predictor  
159 variables and the study's response variables, which are BVOC and GHG fluxes. Figure S5b  
160 graphically represents these Pearson correlations, offering specific insights into how variations in  
161 environmental factors are associated with patterns of BVOC and GHG fluxes in the upland forest.  
162 This dual visualization, with Figure S5a detailing the links between predictors and Figure S5b  
163 focusing on the interactions between predictors and responses, allows for a nuanced interpretation  
164 of the factors driving gas fluxes.

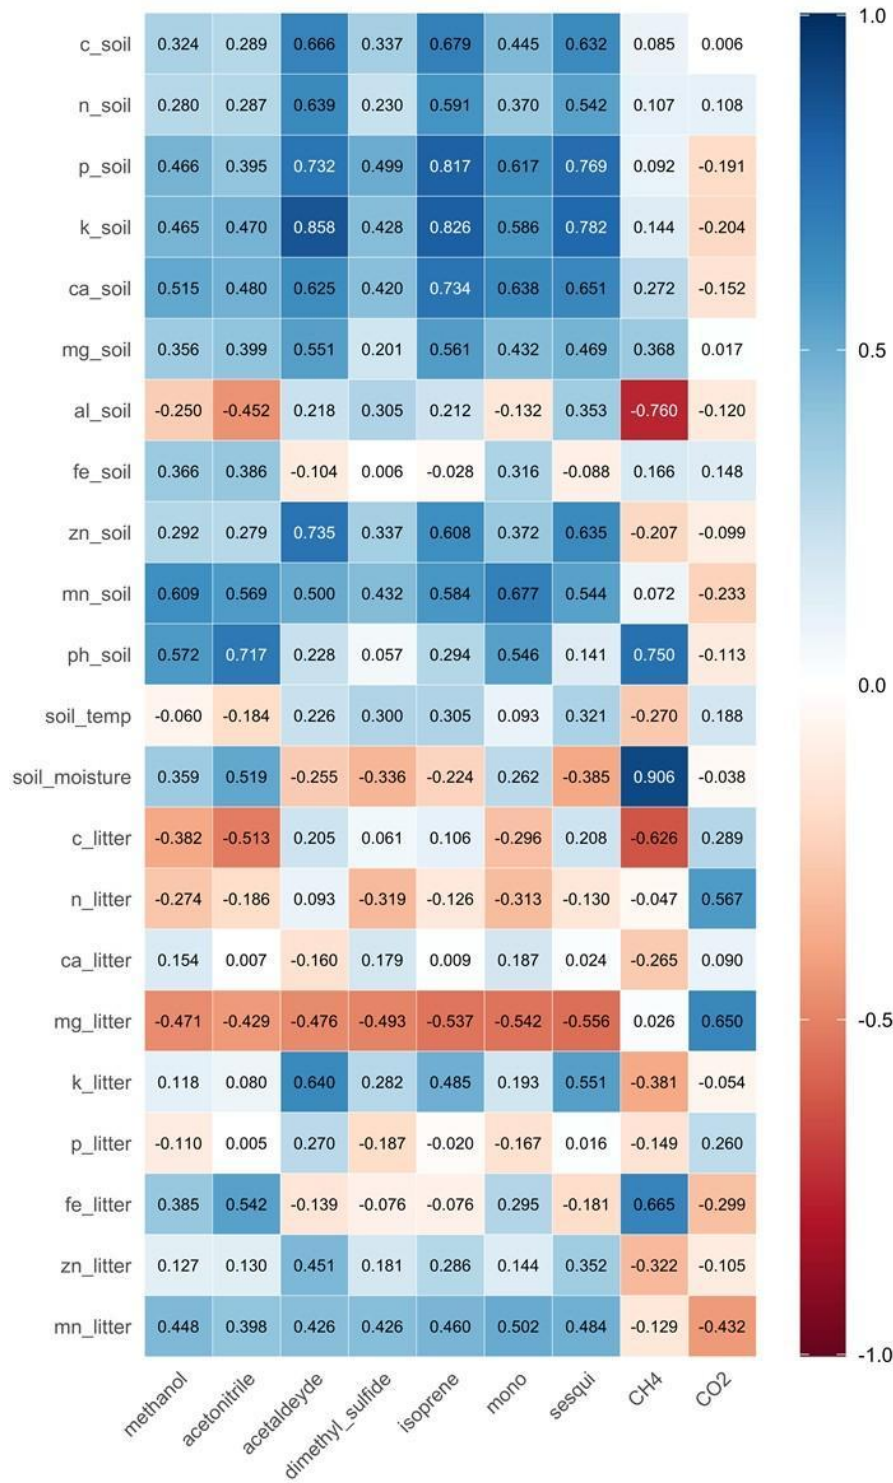

165

166 **Figure S5b.** Heatmap for the Pearson correlation coefficients for the correlation between gas  
 167 fluxes and their potential predictors in the upland forest. N = 12.

168

169 **S6. Tangled Influences of Soil Moisture and Temperature on BVOC and CH<sub>4</sub> Fluxes**

170 **S6.1 Relation between soil moisture and soil temperature (all forest types)**

171 Generally, drier soil conditions were associated with warmer soil temperatures (Figure S6), with  
172 coefficients of determination (R<sup>2</sup>) of 0.82 (AR), 0.28 (WS), and 0.17 (UP). This interdependent  
173 behavior complicates the interpretation of direct relationships between soil moisture, soil  
174 temperature, and soil fluxes (Figure S7).

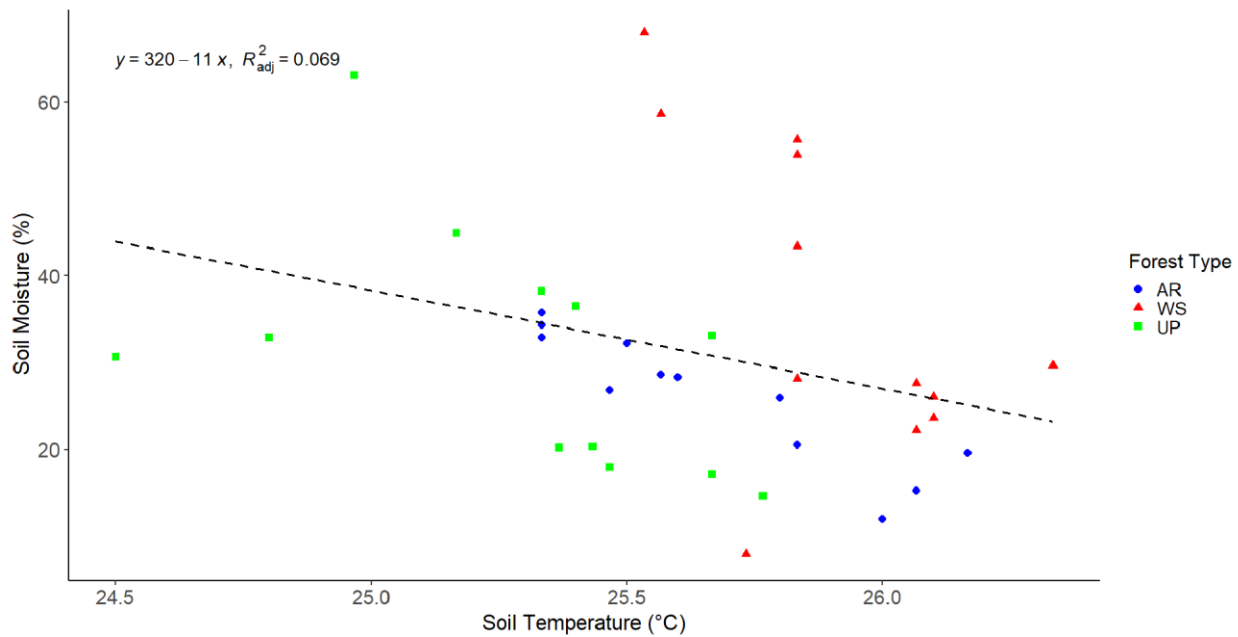

175  
176 **Figure S6.** Relation between soil moisture and soil temperature in all forest types (AR, WS and  
177 UP), average of five measurements taken in the topsoil. The dashed line represents the linear  
178 regression fitted to the data, indicating the general trend of the relationship between soil moisture  
179 and soil temperature. This regression model was built based on 36 observations.

180 **S6.2 Relation between soil temperature, soil moisture, and CH<sub>4</sub> fluxes (all forest types)**

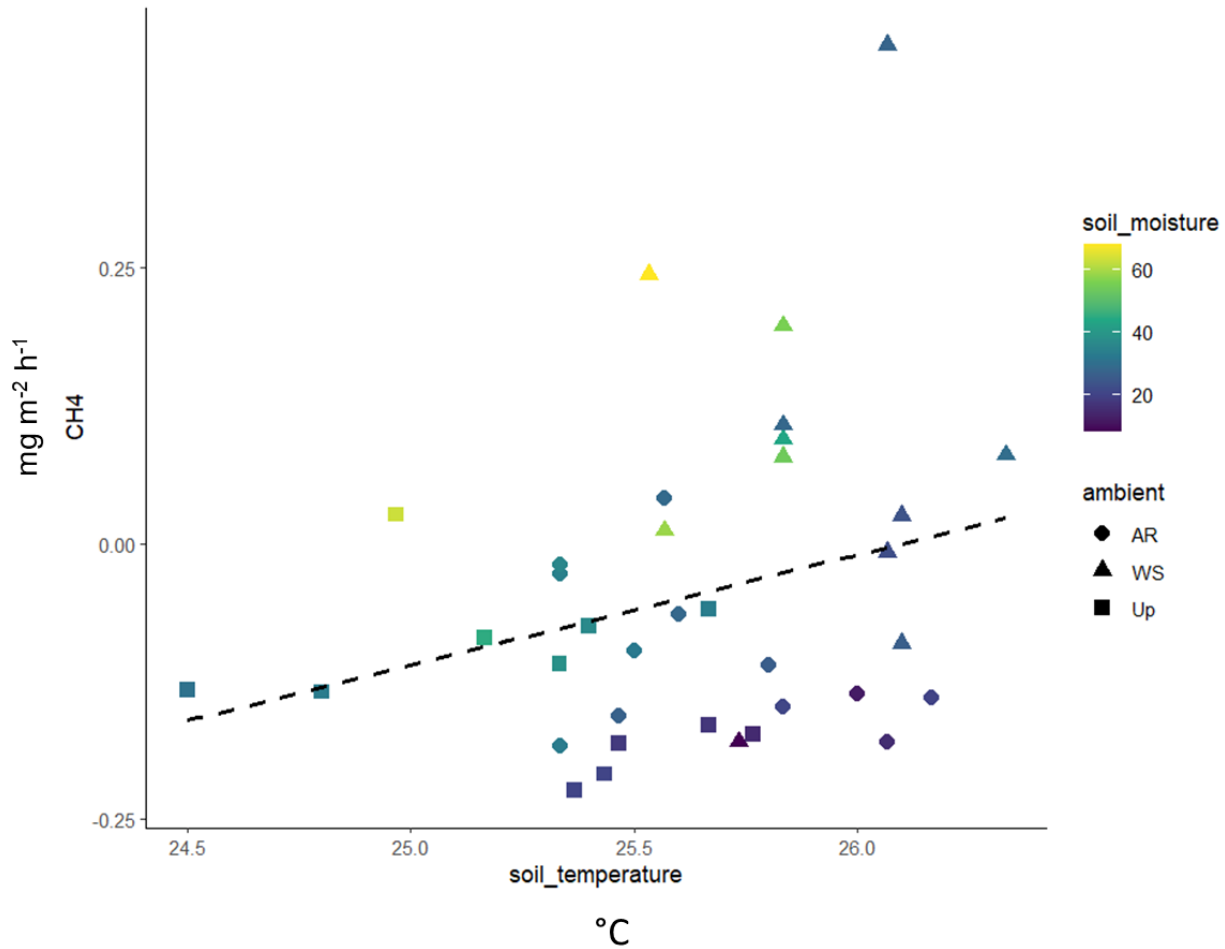

181  
182 **Figure S7.** CH<sub>4</sub> flux from the soil and litter in the different forest types. The figure shows the  
183 relationship between soil-litter CH<sub>4</sub> flux (mg m<sup>-2</sup> h<sup>-1</sup>, y-axis), soil temperature (x-axis), and soil  
184 moisture (color bar), where soil moisture and soil temperature values are an average of five  
185 measurements taken in the topsoil. The dashed line represents the linear regression fitted to the  
186 data, indicating the general trend of the relationship between soil temperature, moisture, and CH<sub>4</sub>  
187 fluxes. This regression model was built based on 36 observations.

188 **S7. Spatial variability**

189 Although we attempted to select homogeneous and representative transects within each forest type,  
190 we still observed differences in soil temperature and soil moisture between transects of the same  
191 forest type, even when measurements were taken at the same time of day and only one day apart

192 (Figure S8). For instance, in the upland forest, transect 1 was drier and warmer than transect 2. In  
193 the white sand forest, transect 2 was colder and wetter than transect 1, likely partly due to a rain  
194 event shortly before the measurements. CO<sub>2</sub> and CH<sub>4</sub> fluxes also exhibited considerable spatial  
195 variability between and within transects (Figure S9). For BVOC fluxes, transects within the same  
196 forest type even showed opposite flux directions, for example, with mostly uptake and mostly  
197 emission in respectively transect 2 and transect 1 of the ancient river terrace forest (Figure S10).

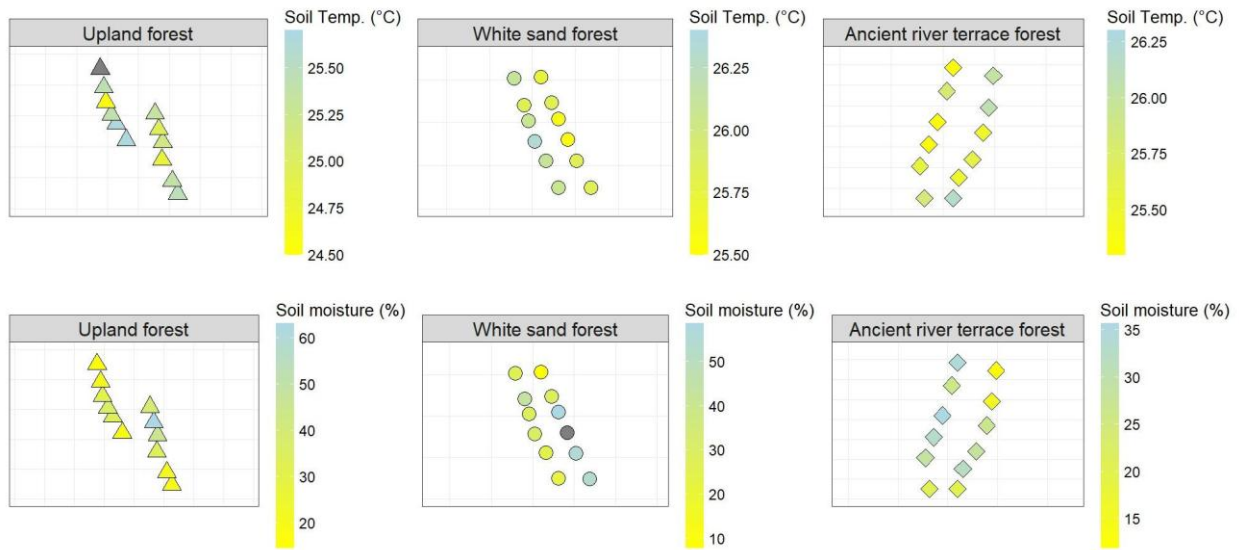

198  
199 **Figure S8.** Map showing the soil temperature (°C) (upper row) and soil moisture (%) (lower row)  
200 for the two transects in each of the three forest types: Up, WS, and AR. Each transect contained  
201 six sampling points, totaling 12 measurement points per forest type. Left - Transect 1; Right –  
202 Transect 2.

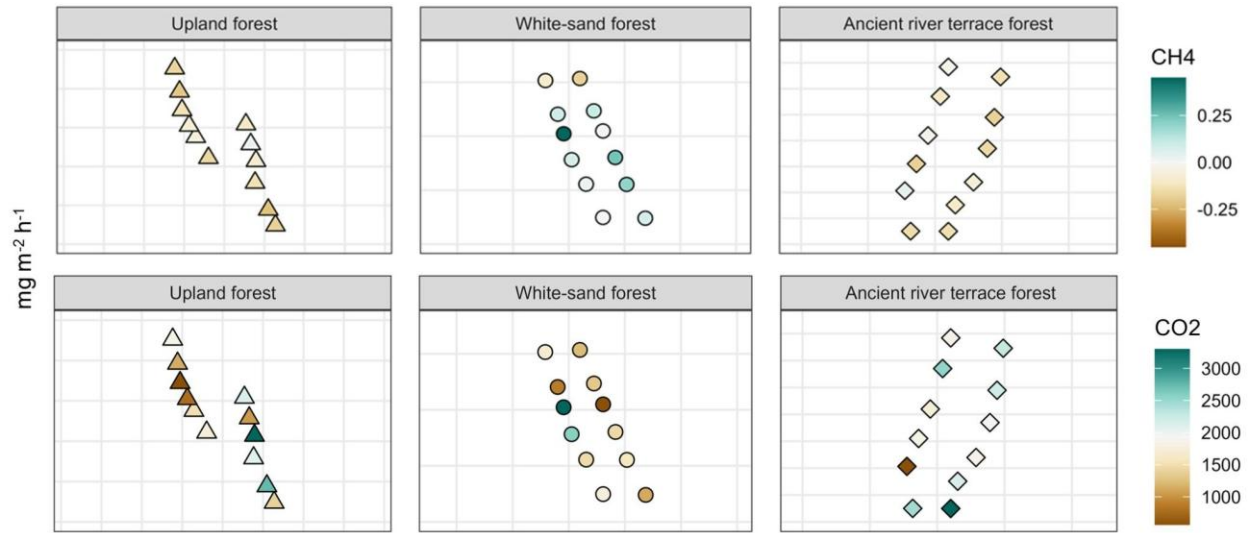

203  
 204 **Figure S9.** Map of the points collected showing the flux of GHG - methane (CH<sub>4</sub>) (upper row) and  
 205 CO<sub>2</sub> (lower row) in each of the three forest types: Up, WS, and AR. Each transect contained six  
 206 sampling points, totaling 12 measurement points per forest type. Left - Transect 1; Right - Transect  
 207 2. The gas flux data are expressed in mg m<sup>-2</sup> h<sup>-1</sup>.

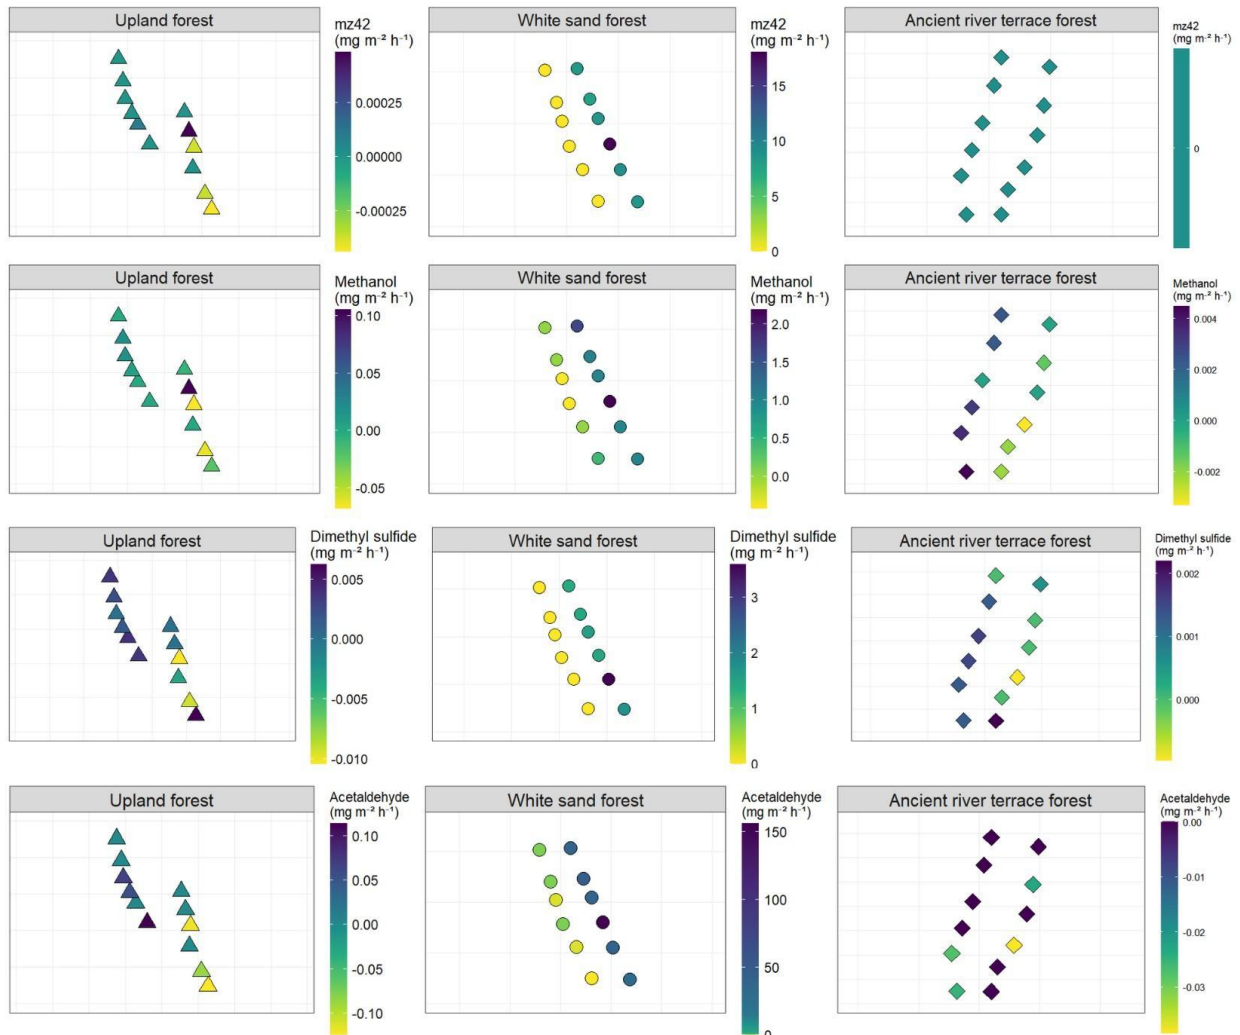

208  
 209 **Figure S10.** Map of the points collected showing the BVOC fluxes (mg m<sup>-2</sup> h<sup>-1</sup>) in each of the  
 210 three forest types: Up, WS, and AR. Each transect contained six sampling points, totaling 12  
 211 measurement points per forest type. Left - Transect 1; Right - Transect 2.  
 212
